# Supplementary material
Source: PubMed Central journal article supplement (PMC4191749)
Supplement: pnas.201412810SI.pdf [file pnas.201412810SI.pdf]

# Supporting Information

Domingue et al. 10.1073/pnas.1412810111

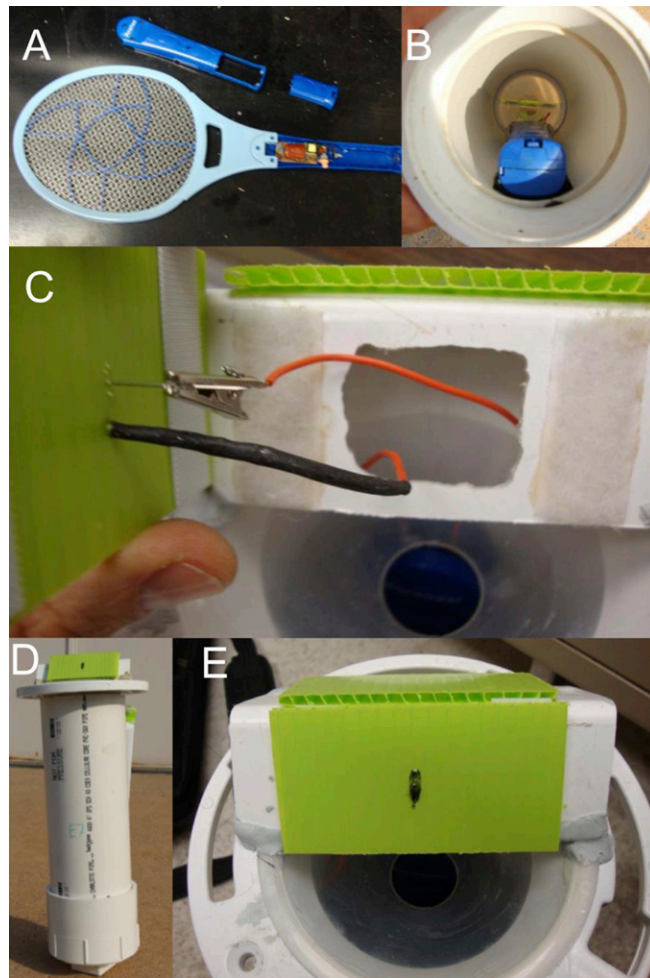

**Fig. S1.** Construction of the electrocution trap. (A) An electric flyswatter (BugKwikZap) was disassembled to provide a 4,000-V potential. (B) Transformer and battery case inside the trap. (C) Wires from the transformer attached to pins through and below the decoy. (D and E) Complete trap showing the decoy poised above the trap opening.

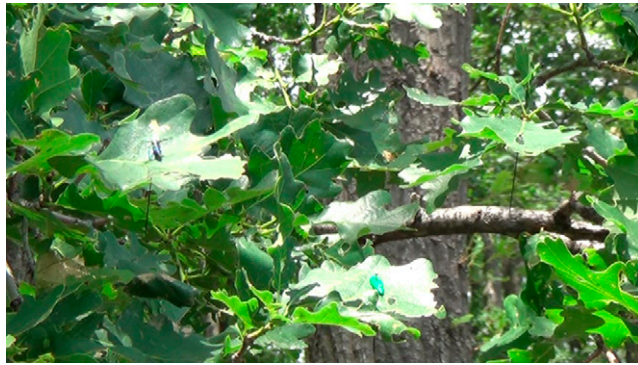

**Movie S1.** *A. biguttatus* male performing a stereotypical flight onto a nano-bioreplicated decoy (type 2), which is pinned to a leaf.

[Movie S1](#)

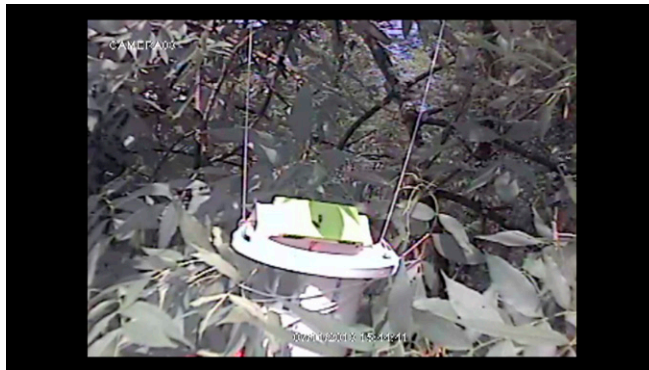

**Movie S2.** *A. planipennis* male performing a stereotypical flight onto an electrified nano-bioreplicated decoy (type 2), causing it to be electrocuted and fall into the trap.

[Movie S2](#)
